# Supplementary material for: The combination of prostate imaging reporting and data system version 2 (PI-RADS v2) and periprostatic fat thickness on multi-parametric MRI to predict the presence of prostate cancer
Source: PubMed Central journal article supplement (PMC5546460; doi:10.18632/oncotarget.17182), 2017-04-18
Supplement: oncotarget-08-44040-s001.pdf [file oncotarget-08-44040-s001.pdf]

## The combination of prostate imaging reporting and data system version 2 (PI-RADS v2) and periprostatic fat thickness on multi-parametric MRI to predict the presence of prostate cancer

### SUPPLEMENTARY MATERIALS

#### SUPPLEMENTARY TABLE

Supplementary Table 1: MRI Imaging Protocols

| Parameters                     | Intera archieva |         |              |         | Discovery MR750, Signa HD |         |         |         |
|--------------------------------|-----------------|---------|--------------|---------|---------------------------|---------|---------|---------|
|                                | T1WI            | T2WI    | DWI          | DCE     | T1WI                      | T2WI    | DWI     | DCE     |
| Repetition time (msec)         | 195             | 2900    | 4000         | 3.3     | 195                       | 4600    | 4000    | 3.3     |
| Echo time (msec)               | 2.4             | 90      | 70           | 1.6     | 2.4                       | 100     | 70      | 1.6     |
| Flip angle (degree)            | 75              | 90,180  | 90           | 15      | 75                        | 90×80   | 90      | 15      |
| Matrix                         | 320×224         | 320×280 | 184×184      | 256×256 | 320×224                   | 320×240 | 184×184 | 256×256 |
| Field of view (mm)             | 360×360         | 260×260 | 260×260      | 260×260 | 360×360                   | 260×260 | 260×260 | 260×260 |
| No. of signal acquired         | 1               | 4       | 4            | 0.75    | 1                         | 2       | 4       | 0.75    |
| Section thickness (mm)         | 6               | 4       | 4            | 2       | 6                         | 4       | 4       | 2       |
| Spacing (mm)                   | 0.5             | -       | -            | -       | 0.5                       | -       | -       | -       |
| b value (sec/mm <sup>2</sup> ) |                 | -       | 0, 800, 1000 | -       |                           |         | 0, 800  | -       |
